# Supplementary material for: Determining Aspergillus fumigatus transcription factor expression and function during invasion of the mammalian lung
Source: PubMed Central journal article supplement (PMC8031882; doi:10.1371/journal.ppat.1009235), 2021-03-29
Supplement: ppat.1009235.s001.pdf [file ppat.1009235.s001.pdf]

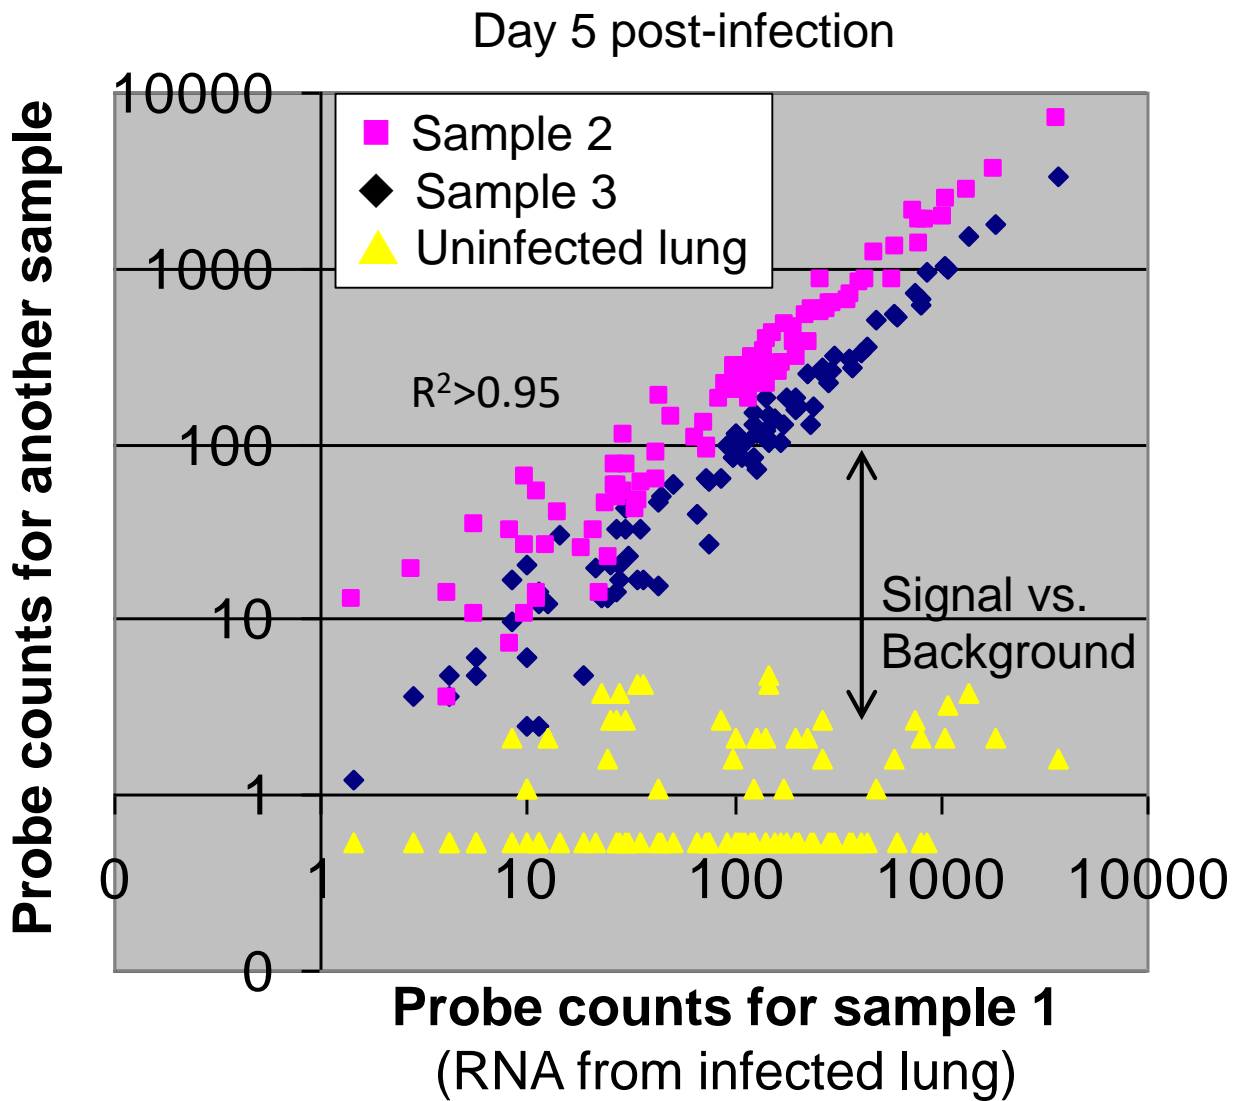

**S1 Fig. High reproducibility and low background of *in vivo* NanoString data.** Shown are NanoString probe counts for 97 environmentally responsive *A. fumigatus* genes in lung samples from 3 mice after 5 d of infection and a single immunosuppressed, uninfected mouse.
