# Supplementary material for: Determining Aspergillus fumigatus transcription factor expression and function during invasion of the mammalian lung
Source: PubMed Central journal article supplement (PMC8031882; doi:10.1371/journal.ppat.1009235), 2021-03-29
Supplement: ppat.1009235.s002.pdf [file ppat.1009235.s002.pdf]

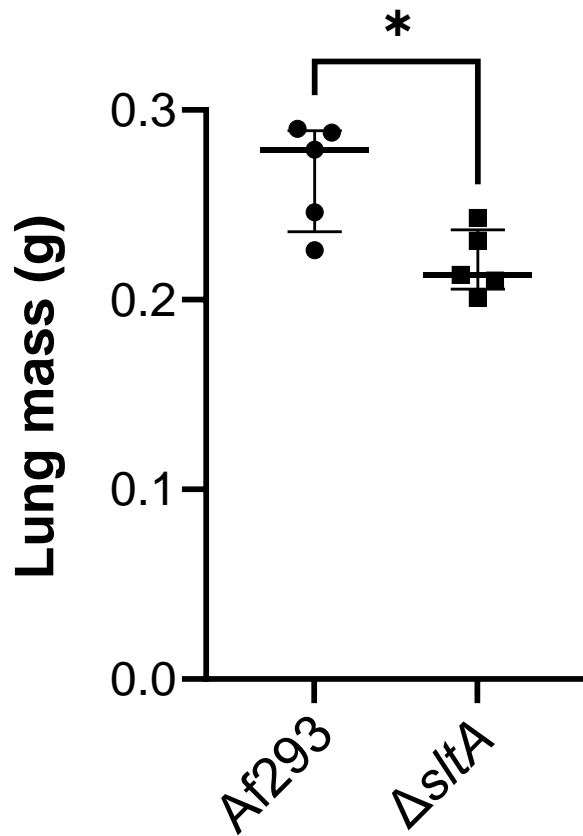

**S2 Fig. Mice infected with the  $\Delta$ sltA mutant have lower lung mass.**

Shown are the lung masses of mice after 5 d of infection with the indicated strains of *A. fumigatus*. Lines indicate the median and interquartile ranges of 5 mice per strain. Symbols indicate the results of individual mice. \* $P < 0.05$ .
