# Supplementary material for: Determining Aspergillus fumigatus transcription factor expression and function during invasion of the mammalian lung
Source: PubMed Central journal article supplement (PMC8031882; doi:10.1371/journal.ppat.1009235), 2021-03-29
Supplement: ppat.1009235.s003.pdf [file ppat.1009235.s003.pdf]

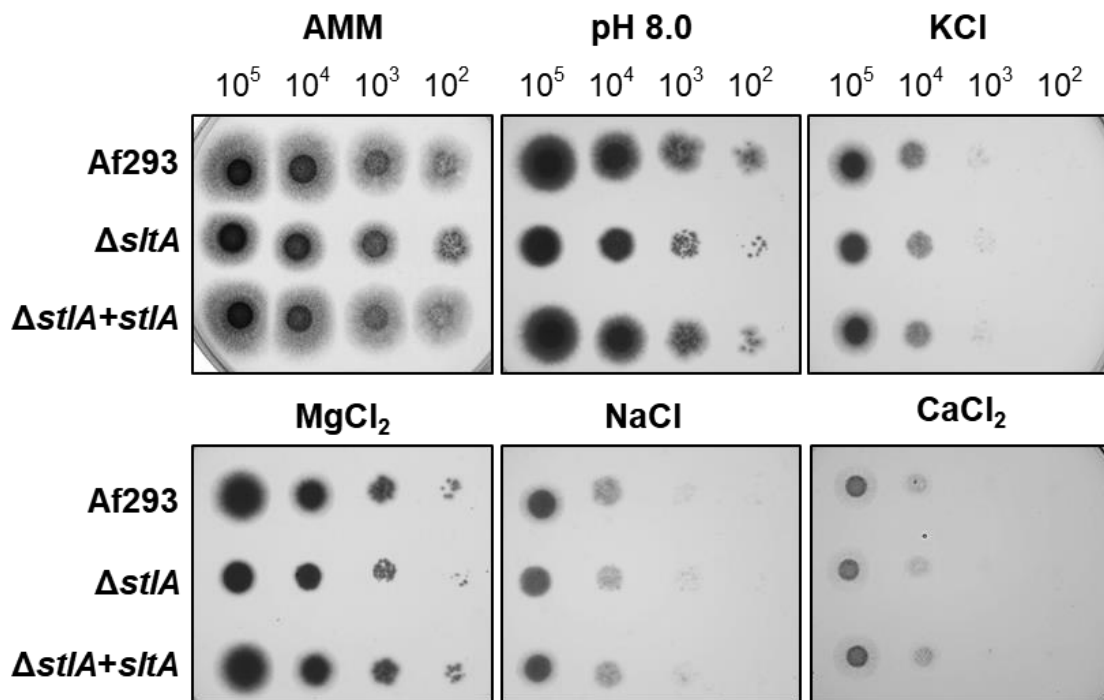

**S3 Fig. The  $\Delta stlA$  mutant has wild-type growth at alkaline pH and in the presence of cations.** Serial 10-fold dilutions of the indicated strains of *A. fumigatus* were spotted onto *Aspergillus* minimal medium (AMM) containing the indicated stressors. The plates were imaged after incubation at 37°C for 2 d.
