# Supplementary material for: Determining Aspergillus fumigatus transcription factor expression and function during invasion of the mammalian lung
Source: PubMed Central journal article supplement (PMC8031882; doi:10.1371/journal.ppat.1009235), 2021-03-29
Supplement: ppat.1009235.s005.pdf [file ppat.1009235.s005.pdf]

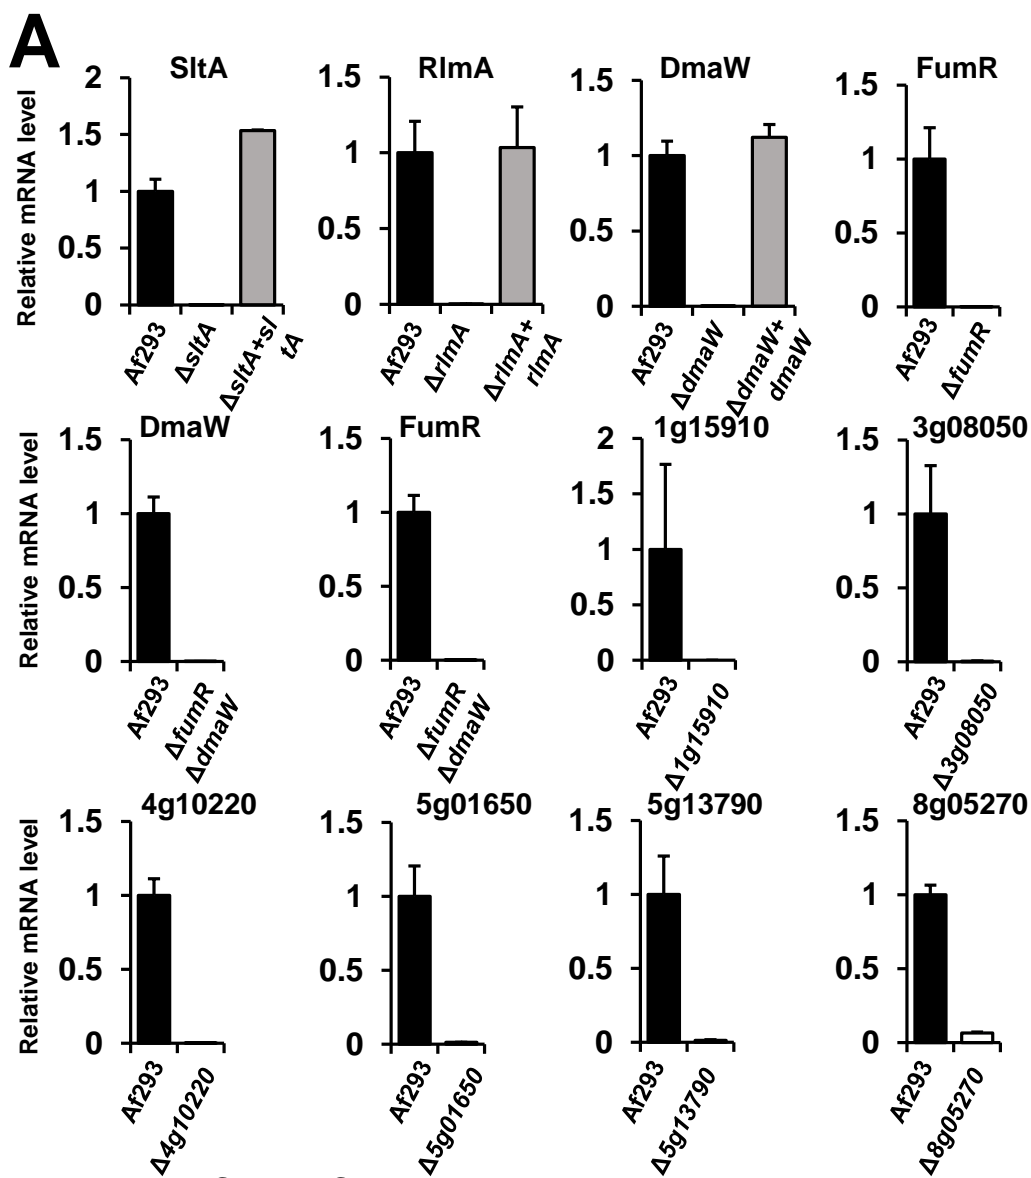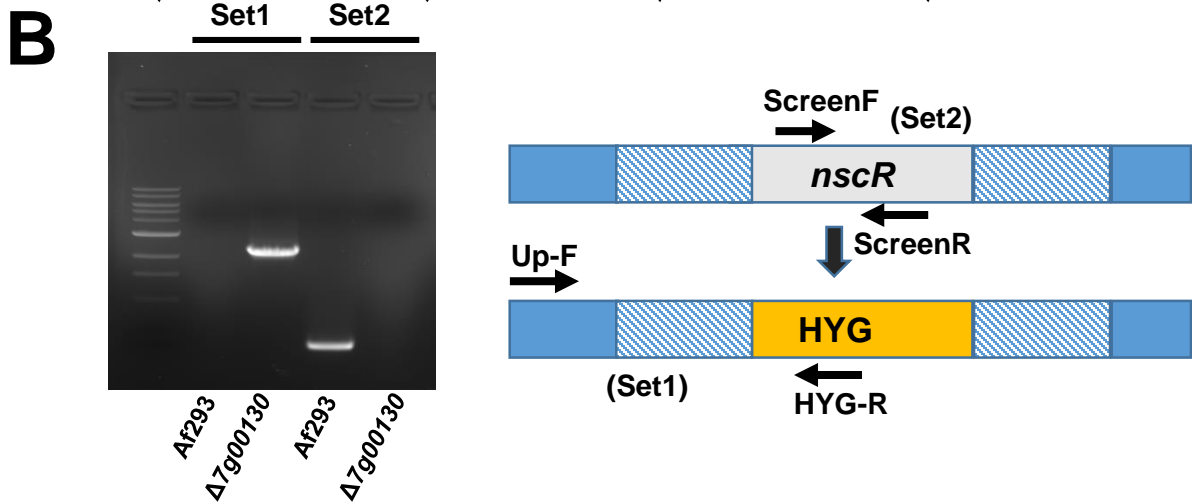

**S5 Fig. Verification of gene deletion in the strains constructed in current study.** (A) qRT-PCR results of relative gene expression in the indicated strains. (B) The replacement of *nscR* (Afu7g00130) by the hygromycin resistance cassette (HYG) was verified by PCR using two different sets of primers.
